# Supplementary material for: Host-symbiont co-speciation and reductive genome evolution in gut symbiotic bacteria of acanthosomatid stinkbugs
Source: PubMed Central journal article supplement (PMC2637841; doi:10.1186/1741-7007-7-2), 2009-01-15
Supplement: 1741-7007-7-2-S1.pdf [file 1741-7007-7-2-S1.pdf]

Additional file 1: Table. Acanthosomatid stinkbug samples used in this study.

| Insect species                  | Collection locality <sup>a</sup>       | Collection date                | Collector | DNA accession number |          |          |
|---------------------------------|----------------------------------------|--------------------------------|-----------|----------------------|----------|----------|
|                                 |                                        |                                |           | 16S rRNA             | groEL    | COI      |
| <i>Elasmotethus humeralis</i>   | Sapporo, Hokkaido (SP <sup>b</sup> )   | 1 July 1995                    | S. Kudo   | AB368823             |          |          |
|                                 | Higashitsuno, Kochi (HG <sup>b</sup> ) | 13 July 2002                   | M. Takai  | AB368825             |          |          |
|                                 | Tsukuba, Ibaraki (TK <sup>b</sup> )    | 22 October 2002                | Y. K      | AB368824             |          | AB368840 |
|                                 |                                        | 14 September 2004 <sup>c</sup> | Y. K      |                      |          |          |
|                                 |                                        | 11 October 2007 <sup>d</sup>   | Y. K      |                      |          |          |
| <i>Elasmotethus nubilus</i>     | Kitaibaraki, Ibaraki                   | 14 August 2002                 | Y. K      | AB368822             | AB379694 | AB368842 |
|                                 | Tsukuba, Ibaraki                       | 14 September 2004 <sup>c</sup> | Y. K      |                      |          |          |
|                                 |                                        | 11 October 2007 <sup>d</sup>   | Y. K      |                      |          |          |
| <i>Elasmotethus brevis</i>      | Sapporo, Hokkaido                      | 27 July 1995                   | S. Kudo   | AB368826             |          | AB368841 |
| <i>Lindbergicoris gramineus</i> | Kumakogen, Ehime                       | 22 July 2000                   | M. Takai  | AB368827             |          | AB368843 |
| <i>Elasmucha putoni</i>         | Sapporo, Hokkaido                      | 10 June 2003 <sup>d</sup>      | S. Kudo   |                      |          |          |
|                                 | Tsukuba, Ibaraki                       | 21 June 2006                   | T. H      | AB368828             | AB379695 | AB368844 |
| <i>Elasmucha dorsalis</i>       | Shintoku, Hokkaido                     | 7 September 2003               | S. Kudo   | AB368829             |          | AB368845 |
| <i>Elasmucha signoreti</i>      | Kumakogen, Ehime                       | 7 July 2002                    | M. Takai  | AB368830             |          | AB368846 |
| <i>Sastragala esakii</i>        | Suwa, Nagano (SW <sup>b</sup> )        | 30 October 2001                | Y. K      | AB368831             |          |          |
|                                 | Tsukuba, Ibaraki (TK <sup>b</sup> )    | 22 October 2002                | Y. K      | AB368832             | AB379696 | AB368848 |
| <i>Sastragala scutellata</i>    | Higashitsuno, Kochi                    | 13 July 2002                   | M. Takai  | AB368833             |          | AB368847 |

Table S1. Continued.

| Insect species                    | Collection locality                  | Collection date | Collector | DNA accession number |       |          |
|-----------------------------------|--------------------------------------|-----------------|-----------|----------------------|-------|----------|
|                                   |                                      |                 |           | 16S rRNA             | groEL | COI      |
| <i>Acanthosoma haemorrhoidale</i> | Sapporo, Hokkaido (SP <sup>b</sup> ) | 29 June 1995    | S. Kudo   | AB368834             |       | AB368849 |
|                                   | Kumakogen, Ehime (KM <sup>b</sup> )  | 6 July 2002     | M. Takai  | AB368835             |       |          |
| <i>Acanthosoma labiduroides</i>   | Higashitsuno, Kochi                  | 5 July 2002     | M. Takai  | AB368836             |       | AB368850 |
| <i>Acanthosoma forficula</i>      | Higashitsuno, Kochi                  | 21 July 2002    | M. Takai  | AB368837             |       | AB368851 |
| <i>Acanthosoma denticaudum</i>    | Obihiro, Hokkaido                    | 27 August 1995  | S. Kudo   | AB368838             |       | AB368852 |
| <i>Acanthosoma giganteum</i>      | Nitta, Gunma                         | 4 July 2002     | E. Hara   | AB368839             |       | AB368853 |

<sup>a</sup> All localities in Japan.

<sup>b</sup> Sample name used in figure 3.

<sup>c</sup> Subjected to transmission electron microscopy.

<sup>d</sup> Subjected to diagnostic PCR analysis.
